# Supplementary material for: Hydrothermal Synthesis of Hematite Nanoparticles Decorated on Carbon Mesospheres and Their Synergetic Action on the Thermal Decomposition of Nitrocellulose
Source: PubMed Central journal article supplement (PMC7711595; doi:10.3390/nano10050968), 2020-05-18
Supplement: nanomaterials-10-00968-s001.pdf [file nanomaterials-10-00968-s001.pdf]

Supplementary Materials:

# Hydrothermal Synthesis of Hematite Nanoparticles Decorated on Carbon Mesospheres and Their Synergetic Action on the Thermal Decomposition of Nitrocellulose

Abdenacer Benhammada <sup>1,2</sup>, Djalal Trache <sup>1,\*</sup>, Mohamed Kesraoui <sup>1</sup> and Salim Chelouche <sup>1</sup>

<sup>1</sup> UER Procédés Energétiques, Ecole Militaire Polytechnique, BP 17, Bordj El-Bahri, Algiers 16046, Algeria; nbenhammada@yahoo.fr (A.B.); kesraoui.mohamed@gmail.com (M.K.); salim.chelouche@gmail.com (S.C.)

<sup>2</sup> Ecole Nationale Préparatoire Aux Etudes d'Ingénieur Badji Mokhtar, ENPEI, BP 5, Rouiba, Algiers 16013, Algeria

\* Correspondence: djalaltrache@gmail.com

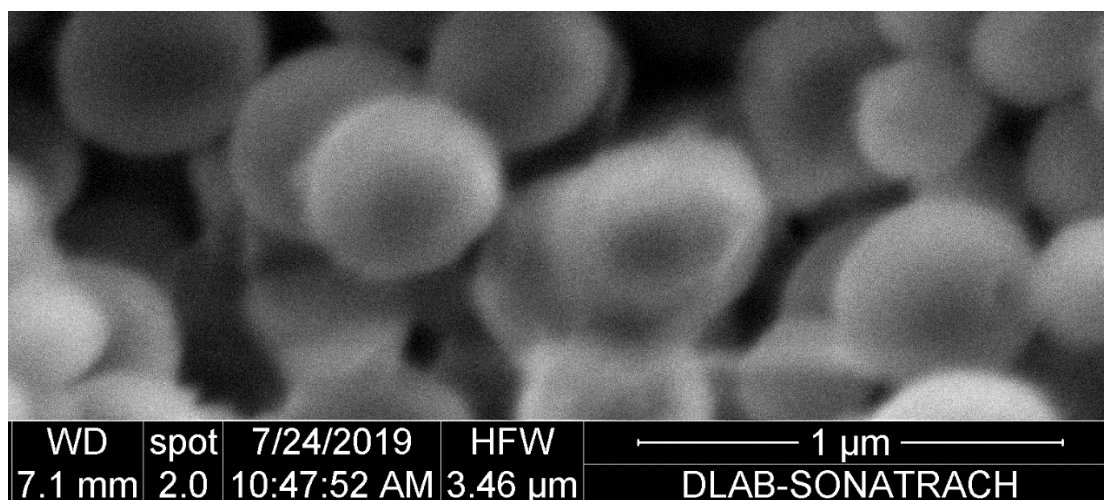

a

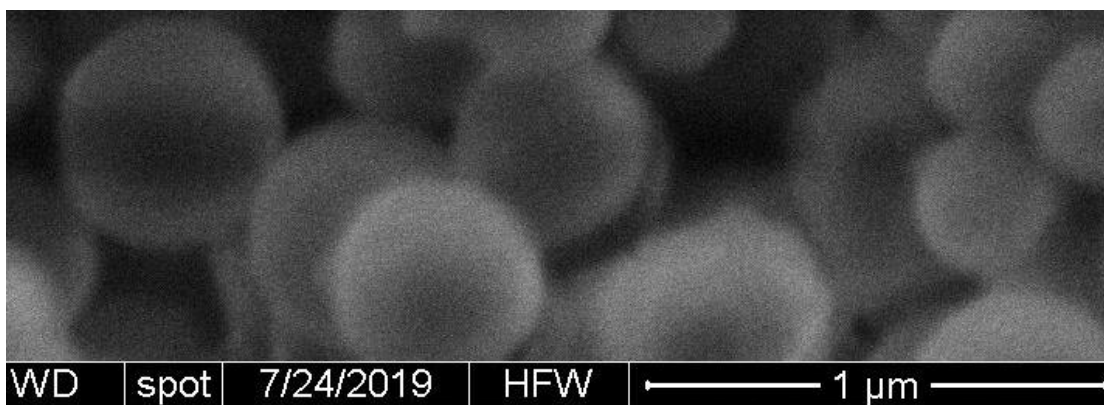

b

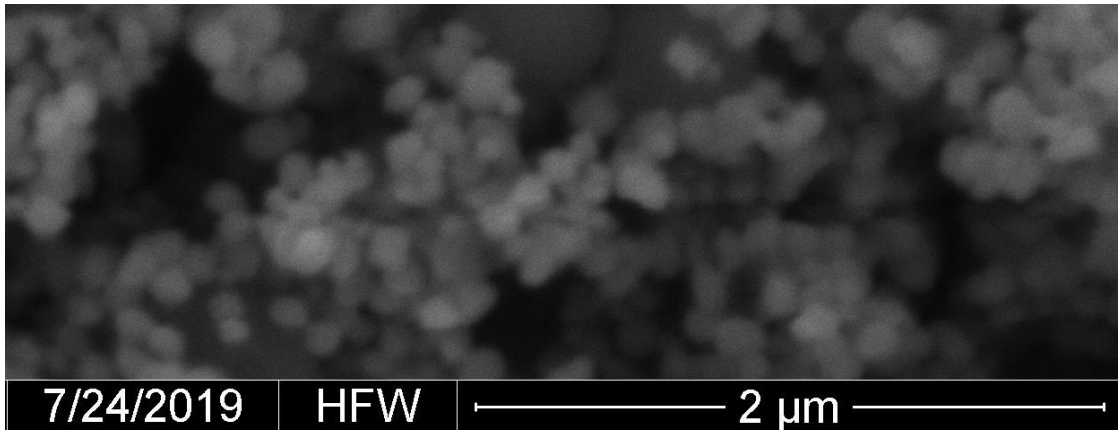

c

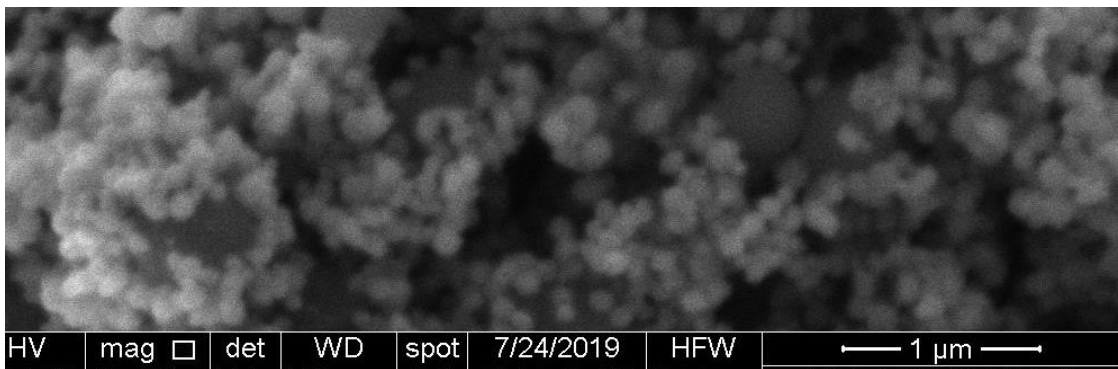

d

**Figure S1.** SEM images treated with ImageJ (a, b) CMS, (c, d) CMS-Fe<sub>2</sub>O<sub>3</sub>.

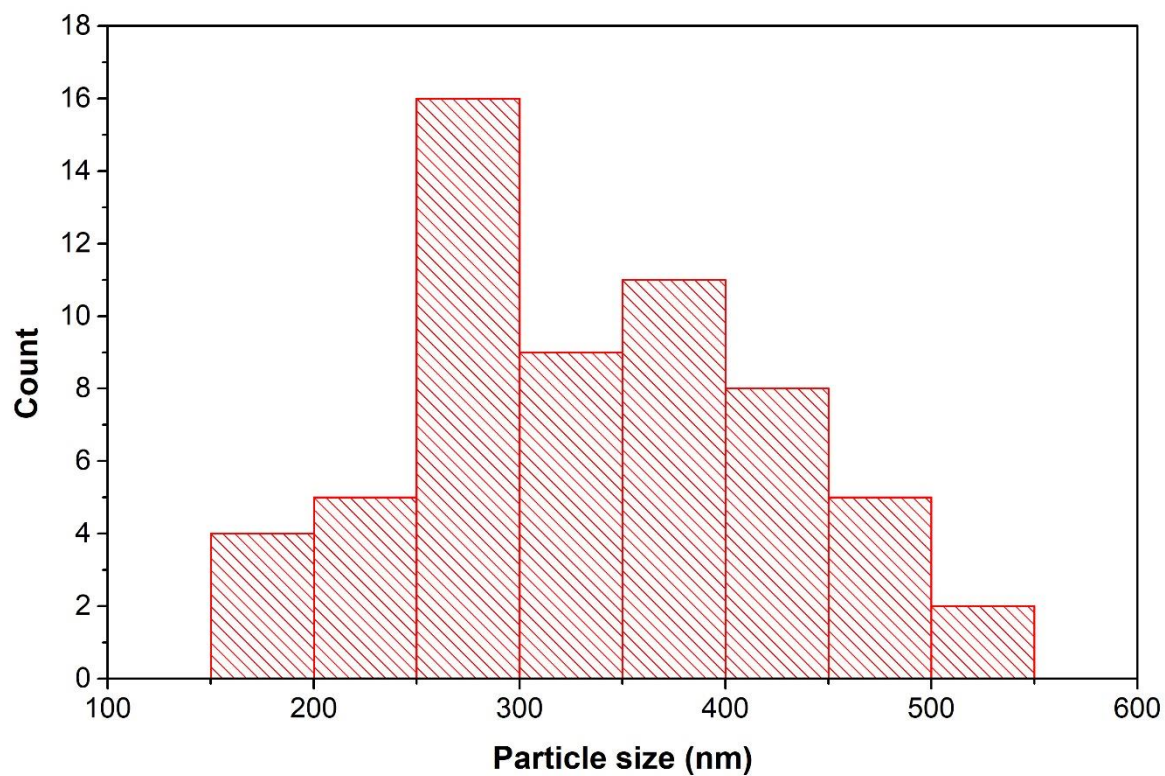

**Figure S2.** Particle size distribution using ImageJ software for MCS.

**Table S1.** Statistics on columns of particle size distribution for MCS.

| <b>Total number of the treated particles</b> | <b>Mean (nm)</b> | <b>Standard Deviation</b> | <b>Sum</b> | <b>Minimum (nm)</b> | <b>Median (nm)</b> | <b>Maximum (nm)</b> |
|----------------------------------------------|------------------|---------------------------|------------|---------------------|--------------------|---------------------|
| 60                                           | 334.5            | 86.9                      | 20071      | 156                 | 319.5              | 513                 |

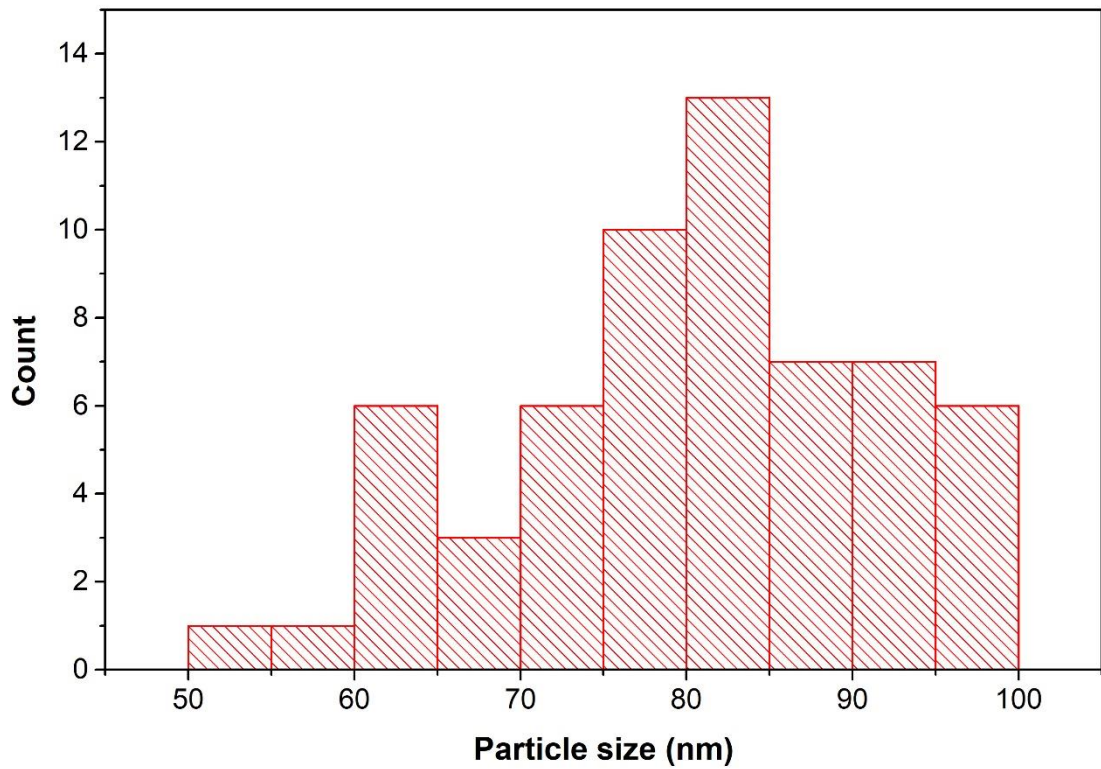

Figure S3. Particle size distribution using ImageJ software for Fe<sub>2</sub>O<sub>3</sub>-MCS.

Table S2. Statistics on columns of particle size distribution for Fe<sub>2</sub>O<sub>3</sub>-MCS.

| Total number of the treated particles | Mean (nm) | Standard Deviation | Sum    | Minimum (nm) | Median (nm) | Maximum (nm) |
|---------------------------------------|-----------|--------------------|--------|--------------|-------------|--------------|
| 60                                    | 80.0      | 11.0               | 4801.8 | 54.5         | 81.1        | 98.0         |
